# Supplementary material for: Interspecific Host Variation and Biotic Interactions Drive Pathogen Community Assembly in Chinese Bumblebees
Source: MDPI journal article supplement (doi:10.3390/insects14110887), 2023-11-17
Supplement: s1 [file s1]

**Table S1.** The information of sample sites and number of bumblebees collected in this study

| Province      | County   | Site            | Altitude | Species                  | Number |
|---------------|----------|-----------------|----------|--------------------------|--------|
| Hebei         | Longhua  | Longhua         | 553      | <i>B. patagiatus</i>     | 30     |
|               |          |                 |          | <i>B. ignitus</i>        | 30     |
| Hebei         | Xinglong | Wulingshan      | 905      | <i>B. patagiatus</i>     | 30     |
|               |          |                 |          | <i>B. ignitus</i>        | 24     |
| Shanxi        | Fangshan | Beiwudang       | 1372     | <i>B. patagiatus</i>     | 15     |
| Shanxi        | Jiaochen | Pangquangou     | 1482     | <i>B. pyrosoma</i>       | 30     |
| Yunnan        | Kaiyuan  | Dazhuang        | 2467     | <i>B. friseanus</i>      | 30     |
| Yunnan        | Mengzi   | Lengquan        | 1583     | <i>B. breviceps</i>      | 30     |
| Jiangsu       | Yixing   | Hufu            | 66       | <i>B. trifasciatus</i>   | 30     |
| Jiangxi       | Nanchang | Wanli_Meiling   | 186      | <i>B. trifasciatus</i>   | 30     |
| Shannxi       | Zhashui  | Yingpan         | 1116     | <i>B. longipes</i>       | 14     |
| Shannxi       | Yangxian | Huayang         | 2289     | <i>B. trifasciatus</i>   | 30     |
| Zhejiang      | Hangzhou | Chunan_Zhaitang | 131      | <i>B. braccatus</i>      | 28     |
| Xinjiang      | Hejing   | Dukugonglu      | 2820     | <i>B. lucorum</i>        | 18     |
|               |          |                 |          | <i>B. keriensis</i>      | 29     |
| Xinjiang      | Mulei    | Shuimogou       | 1608     | <i>B. cryptarum</i>      | 22     |
|               |          |                 |          | <i>B. turkestanicus</i>  | 30     |
|               |          |                 |          | <i>B. cullumanus</i>     | 15     |
|               |          |                 |          | <i>B. subterraneus</i>   | 29     |
|               |          |                 |          | <i>B. soroeensis</i>     | 5      |
|               |          |                 |          | <i>B. armeniacus</i>     | 14     |
| Qinghai       | Guide    | Garang          | 2777     | <i>B. lantschouensis</i> | 30     |
| Gansu         | Huixian  | Lichuan         | 1520     | <i>B. longipes</i>       | 9      |
| Gansu         | Diebu    | Zhagana         | 3277     | <i>B. convexus</i>       | 16     |
|               |          |                 |          | <i>B. rufofasciatus</i>  | 30     |
| Gansu         | Tianzhu  | Shimen          | 2612     | <i>B. waltoni</i>        | 20     |
| Gansu         | Zhuoni   | Daogao          | 2846     | <i>B. lepidus</i>        | 30     |
|               |          |                 |          | <i>B. pyrosoma</i>       | 30     |
| Gansu         | Kangle   | Huguan          | 1978     | <i>B. pyrosoma</i>       | 30     |
| Sichuan       | Nuoergai | Tangke          | 3500     | <i>B. friseanus</i>      | 16     |
|               |          |                 |          | <i>B. keriensis</i>      | 29     |
|               |          |                 |          | <i>B. sushkinis</i> s.l. | 18     |
| Total numbers |          |                 |          |                          | 771    |
