# Supplementary material for: Interspecific Host Variation and Biotic Interactions Drive Pathogen Community Assembly in Chinese Bumblebees
Source: MDPI journal article supplement (doi:10.3390/insects14110887), 2023-11-17
Supplement: s1 [file s1]

Table S2. Primers used for PCR amplification

| Target DNA                           | Primer         | Sequence(5'-3')                         | Reference                         |
|--------------------------------------|----------------|-----------------------------------------|-----------------------------------|
| <i>Apicystis bombi</i>               | NeoF           | CCAGCATGGAATAACATGTAAGG                 | <i>Meeus et al.</i> ,2010         |
|                                      | NeoR           | GACAGCTTCCAATCTCTAGTCG                  |                                   |
| <i>Nosema bombi</i>                  | Nbombi-SSU-Jf1 | CCATGCATGTTTTGAAGATTATTAT               | <i>Klee et al.</i> ,2006          |
|                                      | Nbombi-SSU-Jr1 | CATATATTTTAAAAATATGAAACAATAA            |                                   |
| <i>Crithidia bombi</i>               | CB-Cytb2-F     | GT(A/T)TT(G/A)TTTTT(G/A)TG(G/A)GATT TTG | <i>Schmid-Hempel et al.</i> ,2010 |
|                                      | CB-Cytb2-B     | CATAAACG(T/C)TCACAATAAAATGC             |                                   |
| <i>Locustacarus buchneri</i>         | Lb64F          | GGGAAGGTACAGGAAGTGGATGAACT              | <i>Arismendi et al.</i> ,2016     |
|                                      | Lb417R         | GAATGTAGACCTCTGGGTGTCCGAA               |                                   |
| <i>Nosema apis</i>                   | N. apis F      | CCATTGCCGGATAAGAGAGT                    | <i>Chen et al.</i> ,2008          |
|                                      | N. apis R      | CACGCATTGCTGCATCATTGAC                  |                                   |
| <i>Nosema ceranae</i>                | N. ceranae F   | CGGATAAAAGAGTCCGTTACC                   | <i>Chen et al.</i> ,2008          |
|                                      | N. ceranae R   | TGAGCAGGGTTCTAGGGAT                     |                                   |
| <i>Black queen cell virus</i>        | BQCV1          | TGGTCAGCTCCCACTACCTTAAAC                | <i>Benjeddou et al.</i> ,2001     |
|                                      | BQCV2          | GCAACAAGAAGAAACGTAAACCAC                |                                   |
| <i>Deformed wing virus</i>           | DWV-T3-fwd     | GTCGTGCAGCTCGATAGGAT                    | <i>Tentcheva et al.</i> ,2004     |
|                                      | DWV-T3-rev     | TTTGCAAGATGCTGTATGTGG                   |                                   |
| <i>Acute bee paralysis virus</i>     | ABPVYZF        | GAGATGACTGGGGAGGAGTGATA                 | This study                        |
|                                      | ABPVYZR        | GTCCTGAAAGTAAAGGCTTAGGTTC               |                                   |
| <i>Israeli acute paralysis virus</i> | IAPVF          | AGACACCAATCACGGACCTCAC                  | <i>Hou et al.</i> ,2014           |
|                                      | IAPVR          | AGATTTGTCTGTCTCCCAGTGCACAT              |                                   |
| <i>Chronic bee paralysis virus</i>   | CBPV1-1        | TCAGACACCGAATCTGATTATTG                 | <i>Blanchard et al.</i> ,2008     |
|                                      | CBPV1-2        | ACTACTAGAACTCGTCGCTTCG                  |                                   |
| <i>Sacbrood virus</i>                | SBV-qF3164     | TTGGAACTACGCATTCTCTG                    | <i>Locke et al.</i> ,2012         |
|                                      | SBV-qB3461     | GCTCTAACCTCGCATCAAC                     |                                   |

- Arismendi, N., Bruna, A., Zapata, N. and Vargas, M. (2016) Molecular detection of the tracheal mite *Locustacarus buchneri* in native and non-native bumble bees in Chile. *Insectes Sociaux*, 63, 629-633.
- Benjeddou, M., Leat, N., Allsopp, M. and Davison, S. (2001). Detection of acute bee paralysis virus and black queen cell virus from honeybees by reverse transcriptase PCR. *Applied and Environmental Microbiology*, 67, 2384–2387.
- Blanchard, P., Olivier, V., Iscache, A.L., Celle, O., Schurr, F., Lallemand, P. *et al.* (2008) Improvement of RT-PCR detection of chronic bee paralysis virus (CBPV) required by the description of genomic variability in French CBPV isolates. *Journal of Invertebrate Pathology*, 97, 182–185.
- Chen, Y.P., Evans, J.D., Smith, I.B. and Pettis, J.S. (2008) *Nosema ceranae* is a long-present and wide-spread microsporidian infection of the European honey bee (*Apis mellifera*) in the United States. *Journal of Invertebrate Pathology*, 97, 186–188.
- Hou, C.S., Rivkin, H., Slabezki, Y. and Chejanovsky, N. (2014) Dynamics of the presence of Israeli acute paralysis virus in honey bee colonies with colony collapse disorder. *Viruses*, 6, 2012–2027.
- Klee, J., Tay, W.T. and Paxton, R.J. (2006). Specific and sensitive detection of *Nosema bombi* (Microsporidia: Nosematidae) in bumble bees (*Bombus* spp.; Hymenoptera: Apidae) by PCR of partial rRNA gene sequences. *Journal of Invertebrate Pathology*, 91, 98–104.
- Locke, B., Forsgren, E., Fries, I. and de Miranda, J.R. (2012) Acaricide treatment affects viral dynamics in *Varroa destructor*-infested honey bee colonies via both host physiology and mite control. *Applied & Environmental Microbiology*, 78, 227–235.
- Meeus, I, de Graaf, D.C., Jans, K. and Smagghe, G. 2010. Multiplex PCR detection of slowly-evolving trypanosomatids and neogregarines in bumblebees using broad-range primers. *Journal of Applied Microbiology*, 109, 107–115.
- Schmid-Hempel, R. and Tognazzo, M. (2010) Molecular divergence defines two distinct lineages of *Crithidia bombi* (Trypanosomatidae), parasites of bumblebees. *Journal of Eukaryotic Microbiology*, 57, 337–345.
- Tentcheva, D., Gauthier, L., Jouve, S., Canabady-Rochelle, L. and Bergoin, M. (2004) Polymerase chain reaction detection of deformed wing virus (DWV) in *Apis mellifera* and *Varroa destructor*. *Apidologie*, 35, 431–439.
